# Supplementary material
Source: publisher figshare collection journal article supplement (https://frontiersin.figshare.com/ndownloader/files/12810140)
Supplement: Supplementary file [file 12810140]

Table S4: Discriminant Function Analysis, Study 1 – Structure Matrix

|                                                       | Function 1 | Function 2 | Function 3 |
|-------------------------------------------------------|------------|------------|------------|
| Frequency of use of L1 with the family                | .605*      |            |            |
| Overall frequency of use of L1                        | .400*      |            |            |
| Length of residence                                   | -.345*     |            |            |
| Frequency of L2 use with friends                      | -.343*     |            |            |
| Frequency of L2 use at work                           | -.324*     |            |            |
| Frequency of use of L1 media                          | .240*      |            |            |
| Frequency of use of L1 with friends                   | .227*      |            |            |
| Native language of friends and acquaintances          | .221*      |            |            |
| Frequency of contact with L1 speakers in home country | .196*      |            |            |
| Importance that children should know L1               | .163*      |            |            |
| Level of education                                    |            | .424*      |            |
| Frequency of L2 use at work                           |            | .410*      |            |
| Self-reported proficiency in L2 at time of testing    |            | .374*      |            |
| Age at testing                                        |            | -.186*     |            |
| Self-perceived change to L1                           |            |            | .400*      |
| Culture of preference                                 |            |            | .394*      |
| Language of preference                                |            |            | .391*      |
| Self-perceived bilingual balance                      |            |            | .373*      |
| Language of friends                                   |            |            | .332*      |
| Self-reported proficiency in L1 at time of testing    |            |            | .322*      |
| Importance to maintain L1                             |            |            | .142*      |
